# Supplementary material for: IFI204 Drives Gasdermin D–Mediated Mitochondrial Permeabilization to Amplify Neuronal Pyroptosis in Ischemic Stroke
Source: Research Square preprint supplement (doi:10.21203/rs.3.rs-8641308/v1), 2026-01-23
Supplement: Supplementary file 1 [file 161657d227461f349b56e609.docx]

**Title:** IFI204 drives gasdermin D-mediated mitochondrial permeabilization to amplify neuronal pyroptosis in ischemic stroke

Pengfei Xu1,2, Nan Shen1,2, Tian Qiu1, Mingyue Zhou1, Rui Li1, Chunrong Tao1, Yuyou Zhu1, Wei Hu1*

1 Department of Neurology, The First Affiliated Hospital of USTC, Division of Life Sciences and Medicine, University of Science and Technology of China, Hefei, Anhui, 230001, China.

2 These authors contributed equally: Pengfei Xu, Nan Shen

*** Correspondence**

*Corresponding author: Email: [andinghu@ustc.edu.cn](mailto:andinghu@ustc.edu.cn)

**
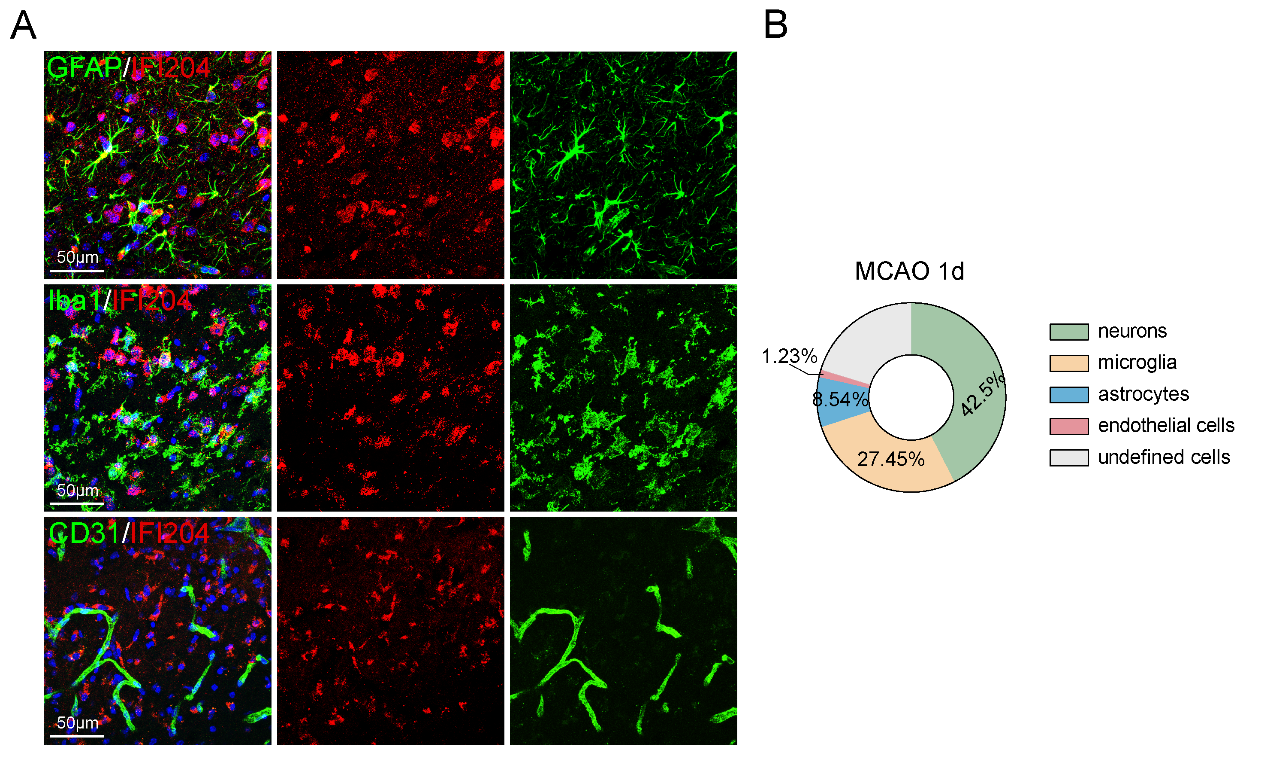
**

**Fig. S1. Cell distribution of IFI204 after ischemic stroke.**

(A)Double-labeling immunofluorescence of IFI204 with markers for astrocytes (GFAP), microglia (Iba1), and endothelial cells (CD31) at 1d after MCAO. Cell nuclei were labeled with DAPI (Scale bar = 50 μm). (B) Quantification showing the distribution of IFI204-positive cells. n = 3

**
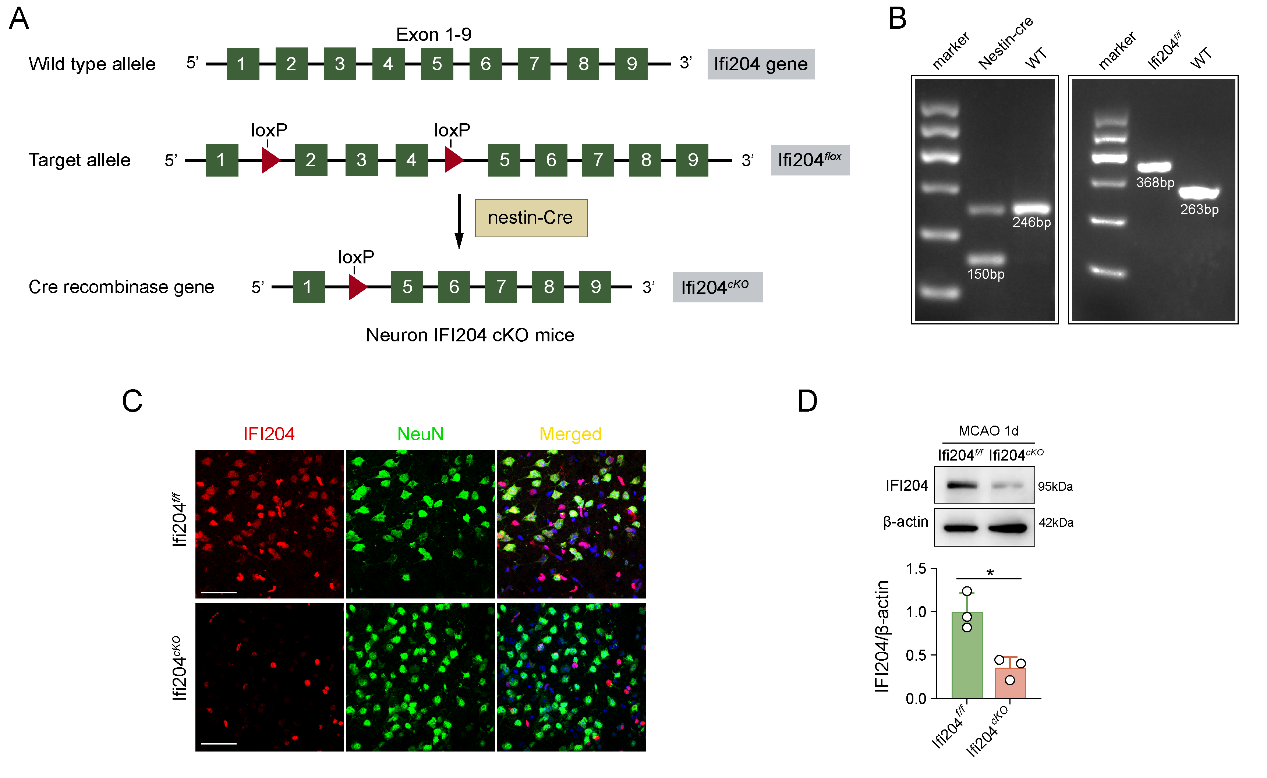
 Fig. S2 Construction and validation of the neuron-targeted IFI204 conditional knockout mice.**

(A) Schematic diagram to generate IFI204Loxp mice with Loxp-flanked exon 2~4 of IFI204 gene. In the presence of Cre, the Loxp sites are recombined and deleted the floxed region of IFI204.

(B) A typical genotyping gel showing analysis of PCR products with agarose gel electrophoresis. The predicted size of the IFI204*f/f* or IFI204*cKO* floxed alleles are 263 bp and 368 bp, Nestin-cre allele is 150 bp.

(D) Representative images of IFI204/NeuN double immunostaining.

(D) Western blot analysis showing the expression of IFI204 at 1d after MCAO in both IFI204*f/f* and IFI204*cKO* mice. n = 3. Data indicate means ± SD. *p < 0.05.

**
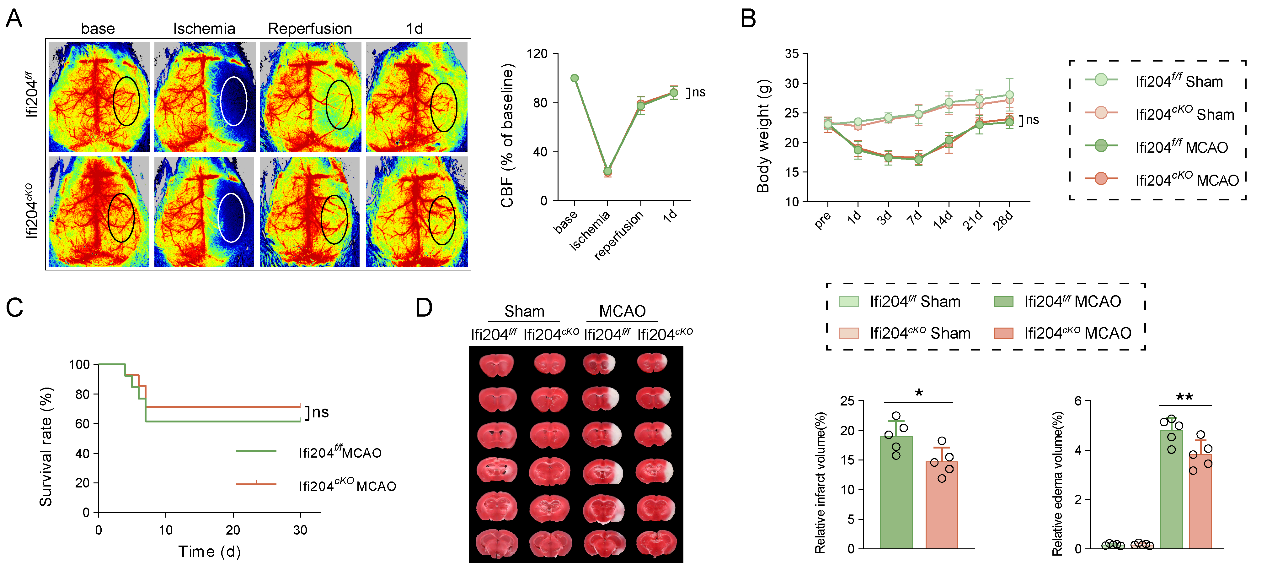
 Fig. S3 Cortical reperfusion, long-term body weight loss, mortality rate and ischemic damage**

(A-C) IFI204*f/f* and IFI204*cKO* mice showed comparable reductions in cortical cerebral blood flow (A) and body weight (B), mortality rate (C).

(D) A representative TTC-stained coronal sections showing infarctions in IFI204*f/f* and IFI204*cKO* female mice (left). Statistical analysis of the infarct and edema ratio (right). n = 5. Data indicate means ± SD. ns, not significant. *p < 0.05, ***p < 0.001.

**
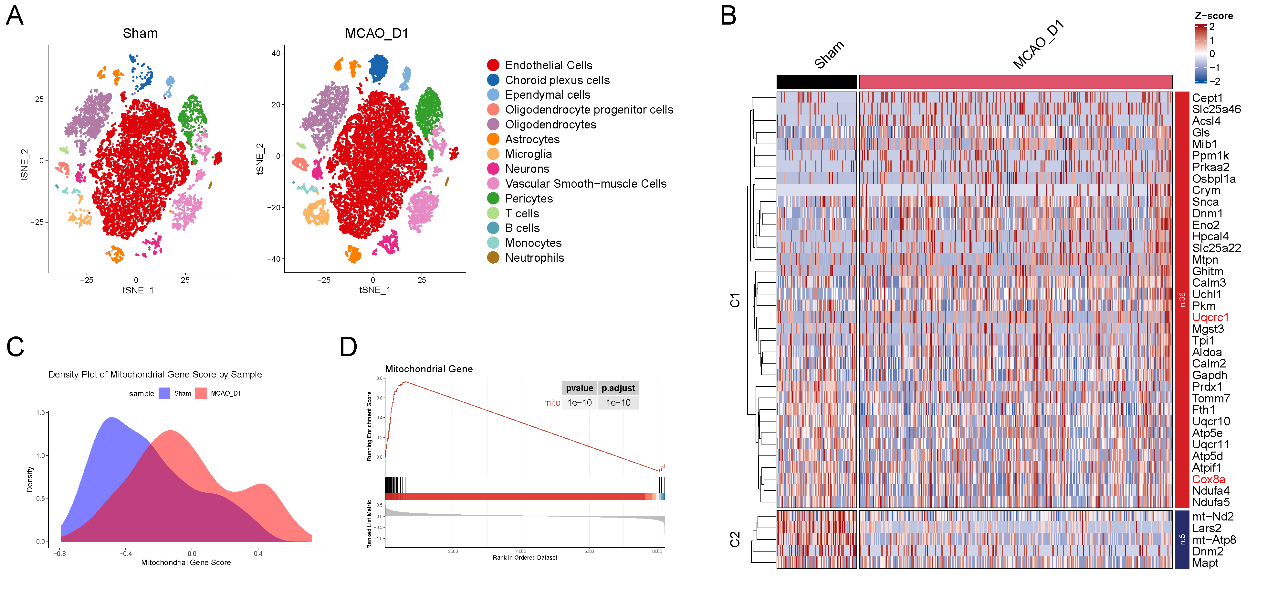
 Fig. S4 Single-nucleus RNA sequencing from MCAO showed a general uptrend among mitochondria-associated genes in neurons**

(A) T-distributed stochastic neighbor embedding (t-SNE) visualizing all single cells from sham and MCAO mice.

(B) Heatmap revealed the mitochondria-associated differential expression genes between sham and MCAO groups.

(C, D) GSEA plot reveals significant enrichment of the mitochondrial gene set in the MCAO group.

**
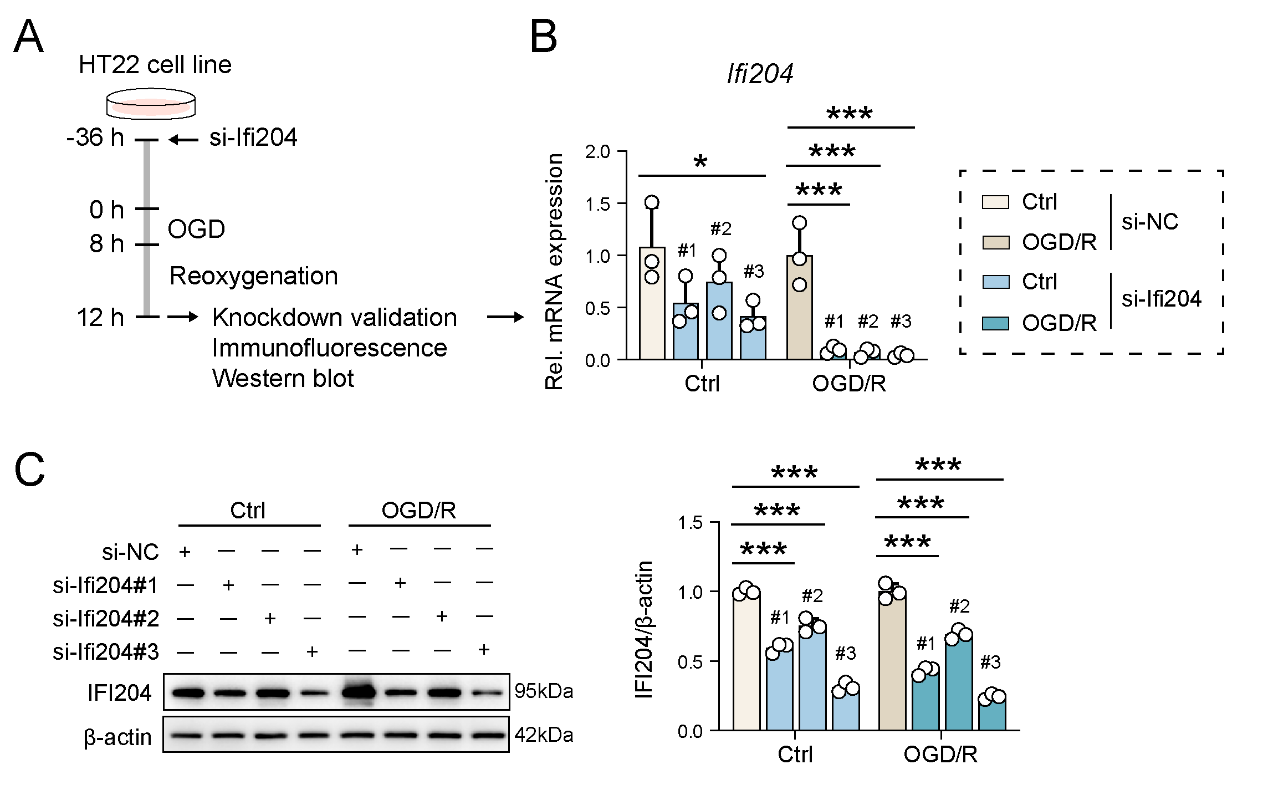
**

**Fig. S5 Knockdown of IFI204 expression by IFI204 siRNA in HT-22 cell lines.**

(A) HT-22 cells were transfected with IFI204 siRNA (si-IFI204) or negative control siRNA (si-NC) and treated with OGD/R.

(B) Validation of siRNA knockdown efficiency in HT-22 cells as determined by qRT-PCR.

(C) Western blot was used to analyse IFI204 protein levels after transfection (36 h) with or without OGD/R.

n = 3. Data indicate means ± SD. *p < 0.05, ***p < 0.001.

**
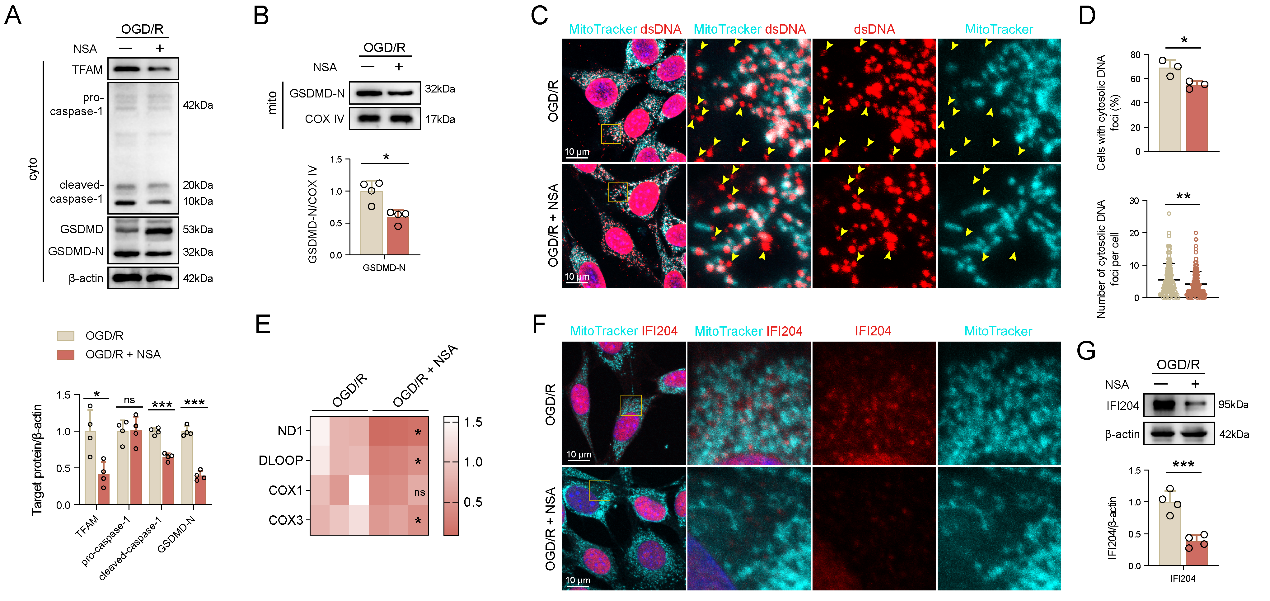
 Fig. S6 Alleviation of neuronal pyroptosis by limiting GSDMD pore-mediated mitochondrial DNA leakage.**

(A) HT-22 cells were incubated with NSA or saline before and after OGD/R. Protein levels of TFAM, pro-Caspase-1, cleaved-Caspase-1, GSDMD, and GSDMD-N. n = 4.

(B) Immunoblot of mitochondria probed for GSDMD-N and COX IV. n = 4.

(C) Representative confocal images of mitochondrial morphology (MitoTracker) and DNA foci (dsDNA) in HT-22 cells. Yellow arrowheads indicate cytosolic DNA foci (Scale bar = 10 μm). n = 3.

(D) Percentage of HT-22 cells showing cytosolic DNA foci and number of cytosolic DNA foci per cell from (C).

(E) Quantification of mtDNA copy number by PCR using ND1, D-loop, COX1, COX3 probe, from isolated cytosolic fractions of HT-22 cells. n = 3.

(F) Mitochondria and IFI204 were labelled using anti-TOM20 and anti-IFI204 antibodies, respectively. The right image is the enlarged image in the yellow solid box of the left image.

(G) Protein levels of IFI204 after NSA treatment under OGD/R condition. n = 4.

Data indicate means ± SD. ns, not significant. *p < 0.05, **p < 0.01, ***p < 0.001.

**
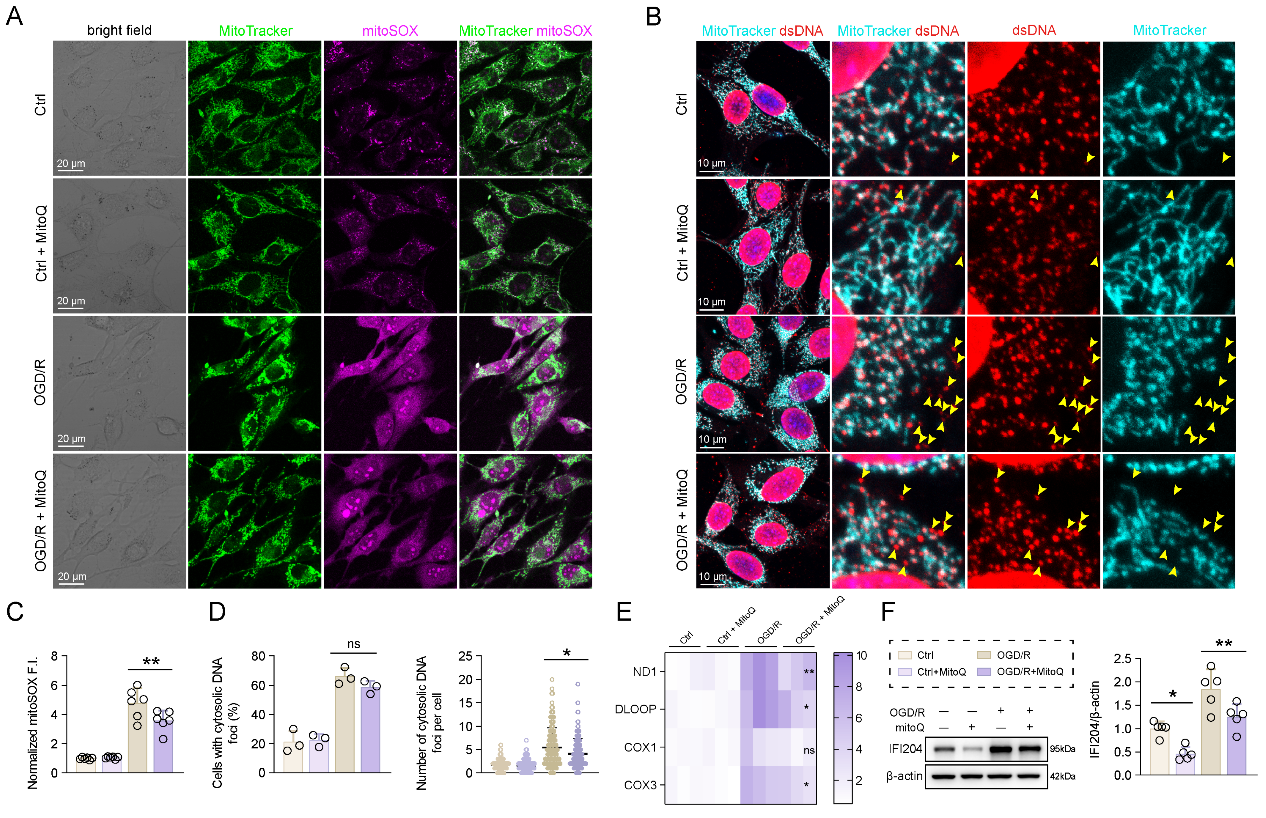
 Fig. S7 MitoQ attenuates mitochondrial oxidative stress and cytosolic mtDNA release after OGD/R.**

(A) Fluorescence microscopic images of mitochondrial superoxide (mitoSOX) and mitochondria (MitoTracker) of MitoQ-treated (20 µg/mL) on HT-22 cells (Scale bar = 20 μm). n = 6.

(B) Representative confocal images of mitochondrial morphology (MitoTracker) and DNA foci (dsDNA) in HT-22 cells. Yellow arrowheads indicate cytosolic DNA foci (Scale bar = 10 μm). n = 3.

(C) Quantitation of MitoSOX fluorescence intensity. n = 6.

(D) Percentage of HT-22 cells showing cytosolic DNA foci and number of cytosolic DNA foci per cell from(B). n = 3.

(E) Quantification of mtDNA copy number by PCR using ND1, D-loop, COX1, COX3 probe, from isolated cytosolic fractions of HT-22 cells. n = 3.

(F) Representative western blot (left) and quantification (right) of IFI204 present in HT-22 cells. n = 5.

Data indicate means ± SD. ns, not significant. *p < 0.05, **p < 0.01.

**
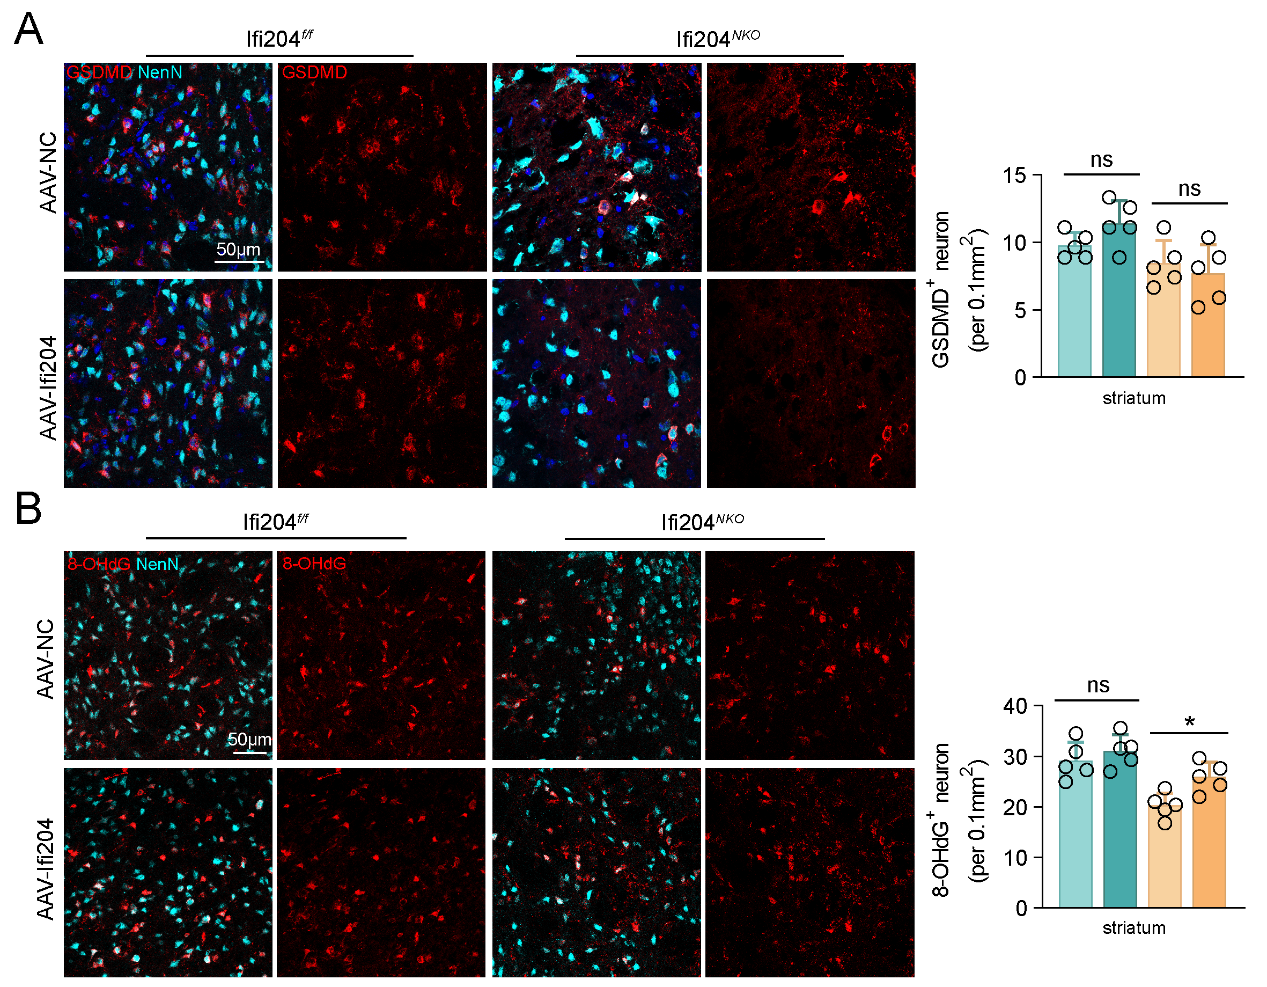
 Fig. S8 AAV-IFI204 increases Damage to striatal neurons**

(A) Representative pictures and quantification of double immunofluorescence staining of GSDMD (red) colocalized with NeuN (cyan) in striatum (Scale bar = 50 μm).

(B) Representative fluorescent images and quantification of 8-OHdG (red)/NeuN (cyan) immunofluorescence staining in striatum (Scale bar = 50 μm).

n = 3/4. Data indicate means ± SD. *p < 0.05.

**
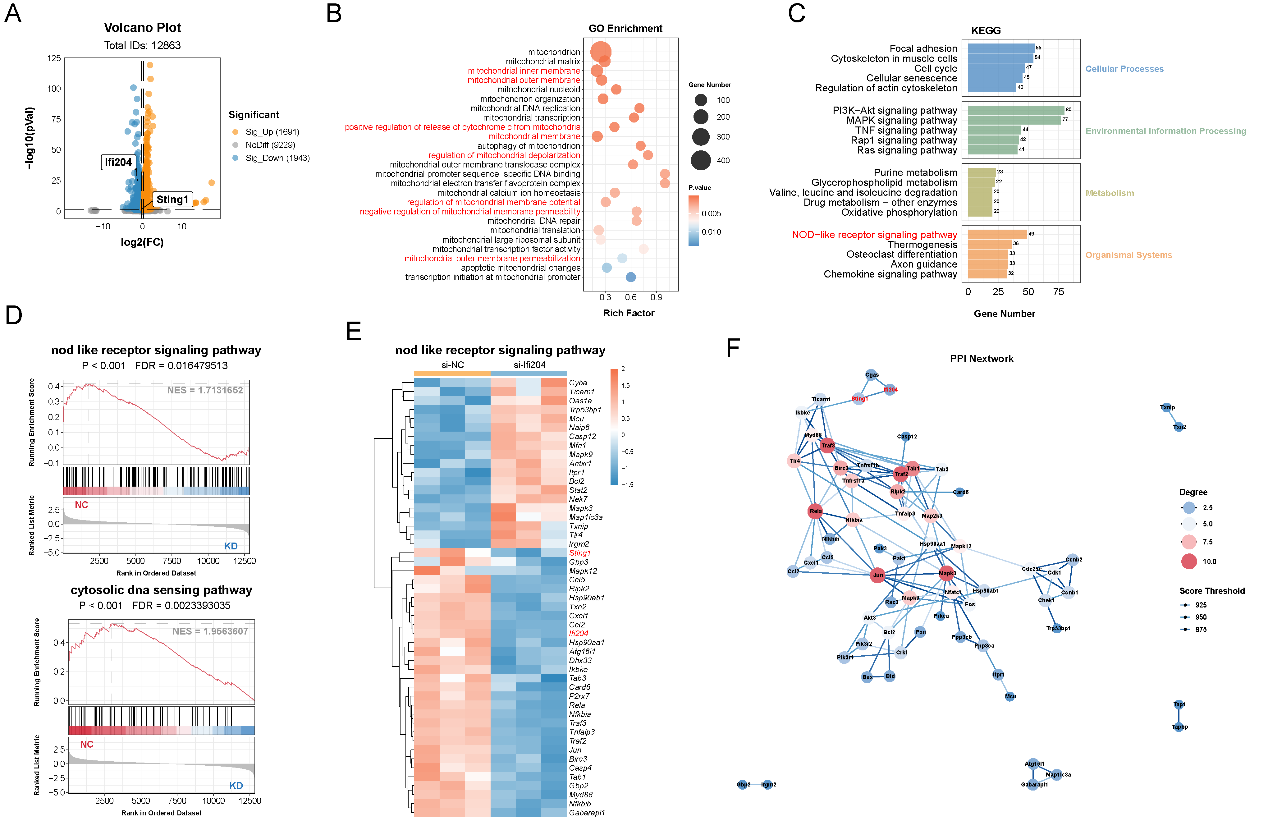
 Fig. S9 High throughput sequencing analysis of HT-22 after si-IFI204 intervention.**

(A) Volcano plot analysis.

(B) The top 25 mitochondrion-related genes were selected in terms of Gene ontology (GO) enrichment analysis.

(C) Enriched Kyoto Encyclopedia of Genes and Genomes (KEGG) pathway included “organismal systems”, “environmental information process”, “metabolism”, and “cellular processes”.

(D) GSEA enrichment plots for differentially expressed pathways of interest.

(E) Heatmap demonstrating coordinated downregulation of Ifi204 and Sting1 within the NOD-like receptor signaling pathway in si-IFI204 treated cells.
(F) Protein-protein interaction (PPI) network constructed for inflammation-associated genes in NOD-like receptor signaling pathway.

**Supplementary Table 1. Primer sequences utilized for PCR**

| **Primer name** | **Primer** **sequence** |
| --- | --- |
| Cox1-F | GCCCCAGATATAGCATTCCC |
| Cox1-R | GTTCATCCTGTTCCTGCTCC |
| Dloop-F | TCCTCCGTGAAACCAACAA |
| Dloop-R | AGCGAGAAGAGGGGCATT |
| ND1-F | GGATCCGAGCATCTTATCCA |
| ND1-R | GGTGGTACTCCCTCTGTAAA |
| mActinb-F | ATGCTCCCCGGGCTGTAT |
| mActinb-R | CATAGGAGTCCTTCTGACCCATTC |
| Cox3-F | CGTGAAGGAAACTACCCAGG |
| Cox3-R | CGCTCAGAAGAATCCTGCAA |
| Tert-F | CTAGCTCATGTGTCAAGACCCTCTT |
| Tert-R | GCCAGCACGTTTCTCTCGTT |

**Supplementary Table 2. Sequences of siRNA oligonucleotides**

| **Primer name** | **Primer** **sequence** |
| --- | --- |
| Ifi204-1 | GCAAGUUCAUCCCAAGAAAtt |
| UUUCUUGGGAUGAACUUGCtt |
| Ifi204-2 | GAGAGUACUUAGUAAAUAAtt |
| UUAUUUACUAAGUACUCUCtt |
| Ifi204-3 | GGACUUGAAUGUAUCAAUAtt |
| UAUUGAUACAUUCAAGUCCtt |

**Supplementary Table 3. Detailed description of antibodies**

| Antibody/Fluorophore | Source | Cat. # | Use |
| --- | --- | --- | --- |
| anti-IFI204 | Abcam | ab307201 | WB/IF |
| anti-Beta Actin | Proteintech | 66009-1-Ig | WB |
| anti-Beta Tubulin | Proteintech | 66240-1-Ig | WB |
| anti-Iba1 | Wako | 011-27991 | IF |
| anti-NeuN | Abcam | ab279297 | IF |
| anti-MAP2 | Novus | NBP3-05552 | IF |
| anti-GFAP | Cell Signaling Technology | 3670 | IF |
| anti-CD31 | BD biosciences | 550274 | IF |
| anti-GSDMD | Santa Cruz Biotechnology | sc-393581 | IF |
| anti-GSDMD | Abcam | ab219800 | WB |
| anti-COX IV | Proteintech | 11242-1-AP | WB |
| anti-TFAM | Cell Signaling Technology | 8076 | WB/IF |
| anti-Aconitase 2 | Proteintech | 11134-1-AP | WB |
| anti-Cytochrome c | Proteintech | 66264-1-1g | WB |
| anti-caspase-1 | Abcam | ab207802 | WB |
| anti-UOCRC1 | Proteintech | 21705-1-AP | WB |
| anti-COX8A | Proteintech | 15368-1-AP | WB |
| anti-dsDNA | Abcam | Ab27156 | IF |
| anti-STING | Proteintech | 19851-1-AP | WB |
| anti-STING | Proteintech | 66680-1-Ig | IF |
| anti-8-OHdG | Santa Cruz Biotechnology | sc-393871 | IF |
| Donkey Anti-Goat IgG H&L (Alexa Fluor® 647) | Abcam | ab150135 | IF |
| Donkey Anti-Rabbit IgG H&L (Alexa Fluor® 594) | Abcam | ab150064 | IF |
| Donkey anti-Rabbit IgG H&L (Alexa Fluor® 488) | Abcam | ab150073 | IF |
| Donkey Anti-Rat IgG H&L (Alexa Fluor® 488) | Abcam | ab150153 | IF |
| Donkey Anti-Rat IgG H&L (Alexa Fluor® 647) | Abcam | ab150155 | IF |
| Donkey Anti-Mouse IgG H&L (Alexa Fluor® 594) | Abcam | ab150108 | IF |
| Donkey Anti-Mouse IgG H&L (Alexa Fluor® 488) | Abcam | ab150109 | IF |
